# Supplementary material
Source: ML conference proceedings conference paper supplement (https://openreview.net/forum?id=W1G1JZEIy5_)
Supplement: supplementary_material [file attachment]

## Sheet: Form Responses 1
Timestamp	How would you describe your knowledge of English?	Rate the fluency of the generated text	Rate the coherence of the generated text	Rate the overall quality of the generated text	Was the generated text written by an AI or a human?	Rate the fluency of the generated text	Rate the coherence of the generated text	Rate the overall quality of the generated text	Was the generated text written by an AI or a human?	Rate the fluency of the generated text	Rate the coherence of the generated text	Rate the overall quality of the generated text	Was the generated text written by an AI or a human?	Rate the fluency of the generated text	Rate the coherence of the generated text	Rate the overall quality of the generated text	Was the generated text written by an AI or a human?	Rate the fluency of the generated text	Rate the coherence of the generated text	Rate the overall quality of the generated text	Was the generated text written by an AI or a human?	Rate the fluency of the generated text	Rate the coherence of the generated text	Rate the overall quality of the generated text	Was the generated text written by an AI or a human?	Rate the fluency of the generated text	Rate the coherence of the generated text	Rate the overall quality of the generated text	Was the generated text written by an AI or a human?	Rate the fluency of the generated text	Rate the coherence of the generated text	Rate the overall quality of the generated text	Was the generated text written by an AI or a human?	Rate the fluency of the generated text	Rate the coherence of the generated text	Rate the overall quality of the generated text	Was the generated text written by an AI or a human?
2020-11-11 21:15:48		3	3	2	AI	6	6	7	Human	5	6	4	AI	6	5	5	AI	6	5	5	AI	6	7	6	AI	6	5	5	AI	7	7	7	AI	4	3	4	AI
2020-11-11 22:30:41	5: Proficient in English	6	6	6	Human	7	7	7	AI	7	6	6	Human	7	4	5	Human	7	3	4	Human	7	2	3	Human	7	1	2	Human	7	4	5	AI	7	2	3	AI
2020-11-11 22:33:58	5: Proficient in English	6	7	6	Human	6	7	6	AI	6	5	5	AI	6	5	5	AI	6	6	6	Human	6	4	6	AI	5	4	5	AI	6	4	5	AI	5	3	5	AI
2020-11-11 22:40:02	5: Proficient in English	6	6	6	Human	6	6	6	Human	4	3	3	AI	5	5	5	AI	6	4	5	AI	6	6	6	Human	5	4	4	AI	5	5	5	Human	5	4	5	AI
2020-11-11 22:57:18	5: Proficient in English	6	5	5	AI	7	6	7	Human	6	5	6	AI	5	4	5	AI	5	5	5	AI	6	3	4	AI	4	3	3	AI	7	5	6	AI	6	4	5	AI
2020-11-11 23:40:46	4: Advanced level of English	7	7	7	Human	7	5	6	AI	7	6	7	AI	7	6	7	AI	7	5	6	AI	7	7	7	AI	7	5	6	AI	7	6	7	AI	7	7	7	Human
2020-11-11 23:42:51	3: High intermediate level of English	5	6	6	AI	6	6	6	Human	4	4	5	AI	5	5	5	AI	3	2	2	AI	5	5	5	Human	2	1	2	AI	4	4	4	Human	3	1	2	AI
2020-11-12 00:05:19	3: High intermediate level of English	7	6	6	AI	5	5	5	Human	6	6	6	AI	6	4	5	Human	6	2	4	AI	5	3	5	Human	5	4	5	Human	6	6	6	Human	6	5	5	AI
2020-11-12 00:17:46	5: Proficient in English	4	4	3	Human	6	5	5	AI	5	5	4	Human	6	4	3	AI	5	6	5	Human	5	7	6	Human	7	5	5	AI	7	7	7	Human	6	5	4	AI
2020-11-12 00:18:19	3: High intermediate level of English	4	3	3	AI	5	4	5	Human	3	4	3	AI	2	2	2	AI	5	5	5	Human	3	3	3	AI	2	2	2	AI	5	5	5	Human	5	4	4	Human
2020-11-12 02:18:08	5: Proficient in English	4	4	3	AI	6	6	6	Human	4	3	3	AI	5	2	2	AI	6	6	5	Human	6	2	3	AI	2	1	2	AI	5	5	6	Human	5	2	4	AI
2020-11-12 04:41:38	5: Proficient in English	5	6	5	AI	7	5	6	AI	4	3	3	AI	4	1	2	AI	4	2	3	AI	5	1	3	AI	3	1	2	AI	5	2	4	AI	5	1	3	AI
2020-11-12 08:26:20	3: High intermediate level of English	6	6	6	Human	6	6	6	Human	6	6	6	Human	6	6	6	Human	2	2	2	AI	6	6	6	Human	2	2	2	AI	2	6	4	AI	2	2	2	AI
2020-11-12 08:35:49	5: Proficient in English	5	1	5	Human	7	6	7	Human	7	1	7	AI	5	2	5	AI	6	2	4	AI	6	3	6	AI	4	3	5	AI	6	3	6	AI	5	3	5	AI
2020-11-12 09:28:27	5: Proficient in English	7	7	6	AI	7	7	7	Human	7	7	6	AI	6	7	5	AI	6	7	6	AI	7	7	6	Human	5	4	3	AI	7	5	6	Human	6	4	5	AI
2020-11-12 09:48:31	3: High intermediate level of English	6	4	6	Human	6	4	6	Human	6	4	6	Human	6	2	6	Human	2	6	6	Human	6	2	6	Human	5	1	6	AI	6	5	6	Human	5	3	5	AI
2020-11-12 10:06:46	5: Proficient in English	7	6	6	AI	7	6	7	Human	7	6	6	AI	7	6	6	Human	7	7	7	Human	7	7	7	Human	5	5	6	AI	7	7	7	Human	6	5	6	AI
2020-11-12 10:38:25	5: Proficient in English	6	7	6	AI	7	7	7	Human	6	5	5	AI	7	7	7	Human	5	5	5	AI	6	7	6	Human	5	5	5	AI	6	7	7	Human	6	6	6	AI
2020-11-12 11:04:56	5: Proficient in English	6	6	5	Human	7	7	7	Human	4	5	4	AI	4	4	4	AI	6	6	6	AI	4	4	3	AI	4	4	4	AI	7	6	7	Human	6	7	6	Human
2020-11-12 11:10:31	3: High intermediate level of English	3	3	3	AI	5	5	5	Human	2	2	1	AI	3	2	3	AI	6	5	6	Human	1	1	1	AI	2	1	2	AI	7	7		Human	4	3	2	AI
2020-11-12 11:14:41	5: Proficient in English	3	5	3	AI	6	6	6	Human	2	3	2	AI	2	2	2	AI	4	2	3	AI	5	3	4	AI	3	2	3	AI	5	5	5	Human	4	2	3	AI
2020-11-12 11:23:15	4: Advanced level of English	6	3	4	AI	7	7	6	Human	7	6	6	AI	7	4	6	Human	7	4	6	AI	7	5	6	AI	7	3	5	AI	7	7	7	Human	7	7	7	Human
2020-11-12 11:52:16	2: Low intermediate level of English	6	5	5	Human	6	6	6	AI	6	5	5	Human	6	6	6	AI	5	6	5	AI	6	6	6	AI	5	6	5	Human	6	7	7	Human	5	5	5	AI
2020-11-12 12:04:31	5: Proficient in English	6	5	5	AI	7	7	7	Human	4	4	4	AI	6	5	5	AI	7	7	7	AI	6	6	6	AI	7	6	6	Human	7	7	7	Human	5	4	4	AI
2020-11-12 12:20:28	5: Proficient in English	3	3	3	AI	6	6	6	Human	3	3	3	AI	2	2	2	AI	3	1	1	AI	6	6	6	Human	2	1	1	AI	4	4	4	AI	3	2	2	AI
2020-11-12 12:20:38	5: Proficient in English	3	3	3	AI	6	6	6	Human	3	3	3	AI	2	2	2	AI	3	1	1	AI	6	6	6	Human	2	1	1	AI	4	4	4	AI	3	2	2	AI
2020-11-12 13:31:34	5: Proficient in English	3	3	3	AI	7	7	7	Human	3	2	2	AI	2	2	2	AI	3	2	2	AI	5	6	6	Human	3	3	2	AI	3	3	3	AI	2	2	2	AI
2020-11-12 13:43:35	5: Proficient in English	6	7	6	AI	7	7	7	Human	7	5	6	AI	6	5	5	AI	5	5	5	AI	7	7	7	Human	7	6	6	AI	7	7	7	Human	6	6	6	AI
2020-11-12 14:01:33	5: Proficient in English	5	4	4	AI	6	7	6	Human	6	6	5	Human	7	6	6	Human	6	5	5	AI	7	7	6	Human	4	3	2	AI	5	4	4	AI	5	4	4	AI
2020-11-12 14:44:11	5: Proficient in English	5	3	4	AI	6	6	6	Human	6	5	5	AI	6	6	6	Human	5	4	4	AI	7	7	7	Human	4	3	3	AI	7	6	6	Human	5	4	5	AI
2020-11-12 15:09:12	5: Proficient in English	5	4	4	AI	6	6	6	Human	3	4	3	AI	3	3	3	AI	2	2	2	AI	5	5	5	Human	2	2	2	AI	5	4	4	AI	5	3	4	AI
2020-11-12 20:05:57	3: High intermediate level of English	4	3	3	AI	7	7	7	Human	3	2	3	AI	2	2	2	AI	4	3	4	Human	6	6	6	Human	6	5	6	Human	6	6	6	AI	6	6	6	AI
2020-11-12 23:13:24	5: Proficient in English	5	2	3	AI	7	7	7	Human	4	2	3	AI	3	2	2	AI	5	5	5	AI	6	7	6	AI	7	7	7	Human	7	7	7	Human	4	6	5	AI
2020-11-12 23:24:04	2: Low intermediate level of English	5	1	3	AI	6	5	6	Human	6	2	3	AI	6	2	3	AI	6	2	3	AI	6	1	3	AI	2	2	1	AI	5	2	3	AI	6	4	5	Human
2020-11-13 02:52:29	3: High intermediate level of English	5	5	4	AI	6	6	6	Human	4	4	3	AI	5	4	4	AI	6	6	6	Human	7	7	7	Human	6	7	7	Human	4	4	4	AI	6	6	6	Human
2020-11-13 05:30:29	3: High intermediate level of English	5	6	6	AI	6	7	6	Human	6	6	7	Human	6	7	6	Human	7	7	7	Human	6	7	6	Human	4	5	5	AI	6	7	6	Human	5	6	6	AI
2020-11-13 06:07:56	3: High intermediate level of English	2	3	2	AI	6	7	6	Human	4	2	3	AI	5	5	5	Human	5	5	5	Human	7	7	7	Human	5	2	3	AI	4	4	4	Human	5	5	5	Human
2020-11-13 08:12:08	4: Advanced level of English	3	5	3	AI	5	6	5	Human	5	5	5	Human	3	2	2	AI	6	6	5	Human	6	6	6	Human	6	6	5	Human	5	4	4	AI	3	3	3	AI
2020-11-13 17:58:10	4: Advanced level of English	7	3	6	AI	7	7	7	Human	7	3	5	AI	5	3	3	AI	6	3	6	AI	7	7	7	Human	5	5	3	AI	7	7	7	Human	6	3	3	AI
2020-11-14 09:07:27	5: Proficient in English	4	4	4	AI	7	7	7	Human	5	6	5	AI	7	6	6	Human	7	6	6	Human	6	5	5	AI	5	4	4	AI	7	7	7	Human	7	5	6	Human
2020-11-14 09:50:44	5: Proficient in English	7	7	7	Human	7	7	7	Human	6	7	6	AI	7	7	7	Human	7	7	7	Human	7	7	7	Human	7	2	3	AI	7	3	3	AI	7	7	7	Human
2020-11-14 11:07:02	5: Proficient in English	3	3	3	AI	6	5	6	Human	3	2	3	AI	3	4	3	AI	6	5	6	Human	6	6	6	Human	7	7	7	Human	3	4	4	AI	5	4	4	AI
2020-11-14 19:55:51	5: Proficient in English	5	5	4	AI	7	7	7	Human	6	6	5	AI	5	7	6	Human	5	4	4	AI	5	6	5	AI	4	2	3	AI	5	5	5	Human	3	3	3	AI
